# Supplementary material for: Prevalence of non-suicidal self-harm and service contact in England, 2000–14: repeated cross-sectional surveys of the general population
Source: PubMed Central journal article supplement (PMC7646286; doi:10.1016/s2215-0366(19)30188-9), 2019-07
Supplement: mmc1.pdf [file mmc1.pdf]

# THE LANCET Psychiatry

## Supplementary appendix

This appendix formed part of the original submission and has been peer reviewed. We post it as supplied by the authors.

Supplement to: McManus S, Gunnell D, Cooper C, et al. Prevalence of non-suicidal self-harm and service contact in England, 2000–14: repeated cross-sectional surveys of the general population. *Lancet Psychiatry* 2019; published online June 4. [http://dx.doi.org/10.1016/S2215-0366\(19\)30188-9](http://dx.doi.org/10.1016/S2215-0366(19)30188-9).

## Prevalence of non-suicidal self-harm and service contact in England, 2000-14: Supplementary materials

**Supplementary Table 1. APMS response rate**

|                             | <b>2000<sup>a</sup></b> | <b>2007<sup>b</sup></b> | <b>2014<sup>b</sup></b> |
|-----------------------------|-------------------------|-------------------------|-------------------------|
| Target households           | 12792                   | 13171                   | 13313                   |
| Interviewed adults          | 8886                    | 7461                    | 7546                    |
| Response rate               | 69%                     | 57%                     | 57%                     |
| Living in England           | 7247                    | 7461                    | 7546                    |
| And aged 16-74              | 7247                    | 6453                    | 6484                    |
| And with valid data on NSSH | 7243                    | 6444                    | 6477                    |

<sup>a</sup> APMS 2000 covered 16 to 74 year olds living in England, Scotland, or Wales.

<sup>b</sup> APMS 2007 and 2014 covered those aged 16 years or over living in England.

**Supplementary Table 2. Factors associated with doing the self-completion part of the interview in APMS 2014<sup>a</sup>**

|                                                                        |                        | Adjusted Odds Ratio | P value | 95% CI |       |
|------------------------------------------------------------------------|------------------------|---------------------|---------|--------|-------|
|                                                                        |                        |                     |         | Upper  | Lower |
| <b>Sex</b>                                                             | Men                    | Ref                 |         |        |       |
|                                                                        | Women                  | 0.99                | 0.939   | 0.76   | 1.29  |
| <b>Age</b>                                                             | 16 to 24               | Ref                 | <0.0001 |        |       |
|                                                                        | 25 to 34               | 0.27                | 0.002   | 0.12   | 0.63  |
|                                                                        | 35 to 44               | 0.26                | <0.0001 | 0.12   | 0.53  |
|                                                                        | 45 to 54               | 0.31                | 0.002   | 0.15   | 0.65  |
|                                                                        | 55 to 64               | 0.18                | <0.0001 | 0.09   | 0.37  |
|                                                                        | 65 to 74               | 0.16                | <0.0001 | 0.07   | 0.34  |
| <b>Ethnic group</b>                                                    | White                  | Ref                 | <0.0001 |        |       |
|                                                                        | Black/Black British    | 0.65                | 0.200   | 0.34   | 1.25  |
|                                                                        | Asian/Asian British    | 0.45                | 0.002   | 0.27   | 0.74  |
|                                                                        | Mixed, multiple, other | 0.23                | <0.0001 | 0.12   | 0.45  |
| <b>Clinical Interview Schedule – revised (CIS-R)<sup>b</sup> score</b> | 0 to 5                 | Ref                 | 0.0010  |        |       |
|                                                                        | 6 to 11                | 0.81                | 0.258   | 0.57   | 1.16  |
|                                                                        | 12 to 17               | 0.90                | 0.661   | 0.57   | 1.44  |
|                                                                        | 18 or more             | 0.48                | <0.0001 | 0.32   | 0.71  |

<sup>a</sup> In the 2014 survey 283 participants (4.8%) aged 16 to 74 choose to not do the self-completion. These participations were more likely to be aged at least 25, to be Asian or of mixed or other ethnicity, and to have severe symptoms of common mental disorder (CIS-R 18+) than those who did do the self-completion.

<sup>b</sup> Higher CIS-R score indicates greater severity of symptoms of common mental disorder.

**Supplementary Table 3. Non-suicidal self-harm ever (reported face to face) by age and sex in England, 2000, 2007 and 2014**

|                                                                                                                          | <b>16-24</b> |           | <b>25-34</b> |           | <b>35-44</b> |          | <b>45-54</b> |         | <b>55-64</b> |         | <b>65-74</b> |         | <b>16-74</b> |          |
|--------------------------------------------------------------------------------------------------------------------------|--------------|-----------|--------------|-----------|--------------|----------|--------------|---------|--------------|---------|--------------|---------|--------------|----------|
|                                                                                                                          | %            | 95% CI    | %            | 95% CI    | %            | 95% CI   | %            | 95% CI  | %            | 95% CI  | %            | 95% CI  | %            | 95% CI   |
| <b>2000</b>                                                                                                              |              |           |              |           |              |          |              |         |              |         |              |         |              |          |
| Men                                                                                                                      | 4.2          | 2.3-7.5   | 3.9          | 2.5-5.9   | 2.0          | 1.1-3.4  | 0.6          | 0.3-1.5 | 0.8          | 0.3-2.0 | -            |         | 2.1          | 1.6-2.7  |
| Women                                                                                                                    | 6.5          | 4.2-10.0  | 3.7          | 2.6-5.2   | 3.0          | 2.0-4.4  | 1.4          | 0.7-2.6 | 0.9          | 0.4-2.1 | 0.2          | 0.1-0.9 | 2.7          | 2.2-3.4  |
| <b>2007</b>                                                                                                              |              |           |              |           |              |          |              |         |              |         |              |         |              |          |
| Men                                                                                                                      | 6.3          | 4.0-9.8   | 5.4          | 3.5-8.1   | 5.5          | 3.8-7.9  | 2.0          | 1.1-3.6 | 1.1          | 0.5-2.3 | -            |         | 3.7          | 3.0-4.5  |
| Women                                                                                                                    | 11.7         | 8.4-16.0  | 3.9          | 2.7-5.6   | 3.9          | 2.7-5.7  | 2.2          | 1.4-3.7 | 0.8          | 0.3-1.3 | 0.2          | 0.0-1.5 | 3.8          | 3.1-4.7  |
| <b>2014</b>                                                                                                              |              |           |              |           |              |          |              |         |              |         |              |         |              |          |
| Men                                                                                                                      | 7.9          | 5.2-11.9  | 10.0         | 6.9-14.3  | 4.9          | 3.2-7.5  | 2.1          | 1.3-3.3 | 2.6          | 1.5-4.5 | 0.9          | 0.4-2.4 | 5.0          | 4.0-6.1  |
| Women                                                                                                                    | 19.7         | 15.7-24.5 | 10.6         | 8.5-13.1  | 7.9          | 6.0-10.2 | 3.8          | 2.6-5.5 | 4.0          | 2.6-5.9 | 1.3          | 0.7-2.5 | 7.9          | 6.9-9.0  |
| <b>Non-suicidal self-harm ever (reported face to face or by self-completion) by age and sex in England, 2014</b>         |              |           |              |           |              |          |              |         |              |         |              |         |              |          |
| Men                                                                                                                      | 9.7          | 6.7-13.8  | 10.9         | 7.7-15.3  | 6.6          | 4.7-9.3  | 3.3          | 2.1-5.0 | 3.3          | 1.9-5.6 | 2.0          | 1.1-3.9 | 6.2          | 5.2-7.3  |
| Women                                                                                                                    | 25.7         | 21.0-31.0 | 13.2         | 10.9-16.0 | 9.2          | 7.2-11.8 | 5.0          | 3.6-6.7 | 5.0          | 3.4-7.2 | 1.8          | 1.0-3.2 | 10.0         | 8.9-11.2 |
| All                                                                                                                      | 17.5         | 14.6-20.8 | 12.1         | 10.0-14.5 | 7.9          | 6.5-9.6  | 4.1          | 3.2-5.3 | 4.1          | 3.0-5.6 | 1.9          | 1.3-3.0 | 8.1          | 7.4-8.9  |
| <b>Non-suicidal self-harm in past year (reported face to face or by self-completion) by age and sex in England, 2014</b> |              |           |              |           |              |          |              |         |              |         |              |         |              |          |
| Men                                                                                                                      | 4.1          | 2.4-7.0   | 1.9          | 0.8-4.4   | 1.1          | 0.4-2.8  | 1.4          | 0.7-2.6 | 0.1          | 0.0-0.9 | 0.4          | 0.1-1.4 | 1.5          | 1.1-2.2  |
| Women                                                                                                                    | 9.1          | 6.3-12.9  | 2.3          | 1.4-3.7   | 1.7          | 1.0-2.9  | 0.7          | 0.4-1.4 | 0.8          | 0.4-1.8 | 0.1          | 0.0-0.6 | 2.4          | 1.9-3.1  |
| All                                                                                                                      | 6.5          | 4.8-8.8   | 2.1          | 1.3-3.2   | 1.4          | 0.8-2.3  | 1.1          | 0.6-1.7 | 0.5          | 0.2-1.0 | 0.2          | 0.1-0.7 | 2.0          | 1.6-2.4  |

**Supplementary Table 4. Methods of non-suicidal self-harm ever used among 16-74-year olds, by sex in 2000, 2007 and 2014**

|                                                                     | <b>Men</b> |         | <b>Women</b> |         | <b>All</b> |         | <b>p-value</b>      |
|---------------------------------------------------------------------|------------|---------|--------------|---------|------------|---------|---------------------|
|                                                                     | %          | 95% CI  | %            | 95% CI  | %          | 95% CI  | for assoc. with sex |
| <b>2000</b>                                                         | n=3237     |         | n=4006       |         | n=7243     |         |                     |
| Cutting                                                             | 1.2        | 0.8-1.8 | 1.7          | 1.3-2.3 | 1.5        | 1.2-1.8 | 0.129               |
| Burning                                                             | 0.0        | 0.0-0.1 | 0.3          | 0.1-0.5 | 0.1        | 0.1-0.3 | 0.013               |
| Poisoning                                                           | 0.3        | 0.1-0.6 | 0.5          | 0.3-0.8 | 0.4        | 0.2-0.6 | 0.321               |
| Other                                                               | 0.8        | 0.5-1.2 | 0.8          | 0.6-1.2 | 0.8        | 0.6-1.1 | 0.839               |
| <b>2007</b>                                                         | n=2824     |         | n=3620       |         | n=6444     |         |                     |
| Cutting                                                             | 2.1        | 1.9-2.8 | 2.5          | 2.0-3.3 | 2.3        | 1.9-2.8 | 0.334               |
| Burning                                                             | 0.6        | 0.4-1.1 | 0.3          | 0.1-0.7 | 0.5        | 0.3-0.7 | 0.179               |
| Poisoning                                                           | 0.3        | 0.1-0.6 | 0.5          | 0.3-0.9 | 0.4        | 0.3-0.6 | 0.187               |
| Other                                                               | 1.0        | 0.7-1.6 | 0.9          | 0.7-1.4 | 1.0        | 0.8-1.3 | 0.706               |
| <b>2014</b>                                                         | n=2638     |         | n=3839       |         | n=6477     |         |                     |
| Cutting                                                             | 2.6        | 2.0-3.4 | 5.3          | 4.5-6.2 | 3.9        | 3.5-4.5 | <0.001              |
| Burning                                                             | 0.7        | 0.4-1.3 | 0.5          | 0.3-0.8 | 0.6        | 0.4-0.9 | 0.268               |
| Poisoning                                                           | 0.5        | 0.3-1.0 | 0.8          | 0.5-1.1 | 0.7        | 0.5-0.9 | 0.283               |
| Other                                                               | 1.2        | 0.8-1.7 | 1.6          | 1.2-2.2 | 1.4        | 1.1-1.8 | 0.199               |
| <b>2014, including those only reporting NSSH by self-completion</b> |            |         |              |         |            |         |                     |
| <b>2014</b>                                                         | n=2501     |         | n=3646       |         | n=6147     |         |                     |
| Cutting                                                             | 3.4        | 2.7-4.3 | 7.0          | 6.1-8.0 | 5.2        | 4.6-5.8 | <0.001              |
| Burning                                                             | 0.9        | 0.5-1.4 | 0.6          | 0.4-0.9 | 0.7        | 0.5-1.0 | 0.280               |
| Poisoning                                                           | 0.9        | 0.5-1.4 | 1.1          | 0.8-1.5 | 1.0        | 0.7-1.3 | 0.534               |
| Other                                                               | 1.6        | 1.2-2.3 | 2.5          | 1.9-3.2 | 2.1        | 1.7-2.5 | 0.066               |

**Supplementary Table 5. Self-reported motivations for non-suicidal self-harm in 16-74-year-olds, 2000, 2007 and 2014**

| <b>Engaged in NSSH in order to cope with unpleasant feelings</b>    |              |           |              |          |              |          |              |         |              |         |              |         |              |         |
|---------------------------------------------------------------------|--------------|-----------|--------------|----------|--------------|----------|--------------|---------|--------------|---------|--------------|---------|--------------|---------|
|                                                                     | <b>16-24</b> |           | <b>25-34</b> |          | <b>35-44</b> |          | <b>45-54</b> |         | <b>55-64</b> |         | <b>65-74</b> |         | <b>16-74</b> |         |
|                                                                     | %            | 95% CI    | %            | 95% CI   | %            | 95% CI   | %            | 95% CI  | %            | 95% CI  | %            | 95% CI  | %            | 95% CI  |
| <b>2000</b>                                                         |              |           |              |          |              |          |              |         |              |         |              |         |              |         |
| Men                                                                 | 3.4          | 1.7-6.7   | 2.1          | 1.2-3.7  | 1.7          | 0.9-3.1  | 0.3          | 0.1-0.9 | 0.4          | 0.1-1.4 | -            | -       | 1.4          | 1.0-2.0 |
| Women                                                               | 5.8          | 3.6-9.1   | 2.9          | 2.0-4.4  | 2.3          | 1.4-3.6  | 0.5          | 0.2-1.1 | 0.6          | 0.2-1.6 | 0.2          | 0.1-0.9 | 2.1          | 1.6-2.7 |
| All                                                                 | 4.6          | 3.1-6.7   | 2.5          | 1.8-3.5  | 2.0          | 1.4-2.9  | 0.4          | 0.2-0.8 | 0.5          | 0.2-1.1 | 0.1          | 0.0-0.5 | 1.8          | 1.4-2.2 |
| <b>2007</b>                                                         |              |           |              |          |              |          |              |         |              |         |              |         |              |         |
| Men                                                                 | 4.3          | 2.0-7.5   | 3.3          | 2.0-5.6  | 4.4          | 3.0-6.6  | 1.7          | 0.9-3.3 | 0.7          | 0.3-1.8 | -            | -       | 2.7          | 2.1-3.4 |
| Women                                                               | 9.4          | 6.6-13.3  | 3.7          | 2.5-5.3  | 3.3          | 2.2-5.1  | 1.8          | 1.0-3.2 | 0.7          | 0.3-1.7 | 0.2          | 0.0-1.5 | 3.2          | 2.6-4.0 |
| All                                                                 | 6.9          | 5.1-9.2   | 3.5          | 2.5-4.8  | 3.9          | 2.9-5.2  | 1.7          | 1.1-2.7 | 0.7          | 0.4-1.3 | 0.1          | 0.0-0.8 | 3.0          | 2.5-3.5 |
| <b>2014</b>                                                         |              |           |              |          |              |          |              |         |              |         |              |         |              |         |
| Men                                                                 | 5.8          | 3.6-9.3   | 8.8          | 5.9-13.1 | 3.6          | 2.2-5.9  | 1.8          | 1.0-3.0 | 2.0          | 1.1-3.8 | 0.7          | 0.2-1.8 | 4.0          | 3.2-5.0 |
| Women                                                               | 17.7         | 13.9-22.3 | 9.4          | 7.4-11.8 | 6.9          | 5.1-9.1  | 3.1          | 2.0-4.6 | 3.1          | 2.0-4.8 | 0.6          | 0.2-1.5 | 6.8          | 6.0-7.8 |
| All                                                                 | 11.6         | 9.3-14.5  | 9.1          | 7.3-11.4 | 5.3          | 4.1-6.7  | 2.4          | 1.7-3.4 | 2.6          | 1.8-3.7 | 0.6          | 0.3-1.3 | 5.4          | 4.8-6.1 |
| <b>2014, including those only reporting NSSH by self-completion</b> |              |           |              |          |              |          |              |         |              |         |              |         |              |         |
| Men                                                                 | 7.0          | 4.6-10.6  | 9.3          | 6.3-13.5 | 4.8          | 3.2-7.2  | 1.8          | 1.0-3.0 | 2.1          | 1.1-3.9 | 1.6          | 0.8-3.3 | 4.6          | 3.8-5.6 |
| Women                                                               | 22.4         | 18.0-27.5 | 11.6         | 9.4-14.3 | 7.8          | 5.9-10.3 | 4.1          | 2.9-5.7 | 3.8          | 2.5-5.6 | 0.9          | 0.4-2.1 | 8.5          | 7.5-9.5 |
| All                                                                 | 14.5         | 11.8-17.7 | 10.4         | 8.5-12.8 | 6.3          | 5.1-7.9  | 2.9          | 2.2-3.9 | 2.9          | 2.1-4.1 | 1.3          | 0.7-2.2 | 6.5          | 5.9-7.3 |
| <b>Engaged in NSSH in order to try to change situation</b>          |              |           |              |          |              |          |              |         |              |         |              |         |              |         |
| <b>2000</b>                                                         |              |           |              |          |              |          |              |         |              |         |              |         |              |         |
| Men                                                                 | 2.6          | 1.2-5.9   | 2.6          | 1.5-4.5  | 0.9          | 0.4-2.2  | 0.5          | 0.2-1.4 | 0.8          | 0.3-2.0 | -            | -       | 1.3          | 0.9-1.9 |
| Women                                                               | 4.2          | 2.4-7.2   | 1.7          | 1.0-2.9  | 1.8          | 1.1-3.1  | 0.9          | 0.5-1.8 | 0.5          | 0.2-1.3 | -            | -       | 1.6          | 1.2-2.1 |
| All                                                                 | 3.4          | 2.2-5.4   | 2.2          | 1.4-3.2  | 1.4          | 0.9-2.1  | 0.7          | 0.4-1.3 | 0.7          | 0.3-1.3 | -            | -       | 1.4          | 1.2-1.8 |
| <b>2007</b>                                                         |              |           |              |          |              |          |              |         |              |         |              |         |              |         |
| Men                                                                 | 3.1          | 1.6-6.0   | 2.3          | 1.2-4.6  | 2.3          | 1.4-3.9  | 1.3          | 0.7-2.7 | 0.6          | 0.2-1.5 | -            | -       | 1.7          | 1.3-2.4 |
| Women                                                               | 5.0          | 3.0-8.2   | 2.4          | 1.5-3.8  | 2.2          | 1.2-3.8  | 0.9          | 0.4-2.0 | 0.4          | 0.1-1.3 | 0.2          | 0.0-1.5 | 1.9          | 1.4-2.5 |
| All                                                                 | 4.0          | 2.7-6.0   | 2.4          | 1.6-3.6  | 2.2          | 1.5-3.3  | 1.1          | 0.6-1.9 | 0.5          | 0.2-1.0 | 0.1          | 0.0-0.8 | 1.8          | 1.5-2.2 |
| <b>2014</b>                                                         |              |           |              |          |              |          |              |         |              |         |              |         |              |         |
| Men                                                                 | 3.4          | 1.6-7.2   | 4.9          | 2.9-8.2  | 1.9          | 1.0-3.4  | 0.7          | 0.3-1.7 | 1.8          | 0.9-3.6 | 0.4          | 0.1-1.2 | 2.3          | 1.7-3.1 |
| Women                                                               | 7.3          | 4.8-10.9  | 4.8          | 3.3-6.8  | 3.5          | 2.4-5.2  | 2.1          | 1.4-3.3 | 2.8          | 1.7-4.5 | 0.6          | 0.3-1.4 | 3.6          | 2.9-4.3 |
| All                                                                 | 5.3          | 3.7-7.7   | 4.8          | 3.5-6.6  | 2.7          | 1.9-3.8  | 1.4          | 1.0-2.1 | 2.3          | 1.5-3.4 | 0.5          | 0.2-1.1 | 2.9          | 2.5-3.5 |
| <b>2014, including those only reporting NSSH by self-completion</b> |              |           |              |          |              |          |              |         |              |         |              |         |              |         |
| Men                                                                 | 3.4          | 1.6-7.2   | 5.0          | 3.0-8.3  | 2.1          | 1.2-3.7  | 1.5          | 0.7-3.1 | 1.8          | 0.9-3.6 | 0.8          | 0.3-1.9 | 2.5          | 1.9-3.4 |
| Women                                                               | 9.2          | 6.3-13.1  | 5.3          | 3.7-7.4  | 4.5          | 3.1-6.5  | 2.9          | 2.0-4.2 | 3.6          | 2.3-5.6 | 0.9          | 0.4-1.8 | 4.4          | 3.7-5.2 |
| All                                                                 | 6.2          | 4.4-8.7   | 5.2          | 3.8-6.9  | 3.3          | 2.4-4.5  | 2.2          | 1.5-3.1 | 2.7          | 1.9-3.9 | 0.8          | 0.5-1.5 | 3.5          | 3.0-4.1 |
